# Supplementary material
Source: PubMed Central journal article supplement (PMC2915941)
Supplement: NIHMS217828-supplement-01.pdf [file NIHMS217828-supplement-01.pdf]

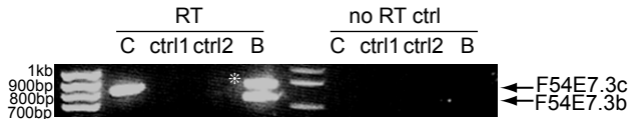

Figure S1. Both long and short par-3 transcripts are present in somatic tissues.

mRNA isolated from L3-L4 stage *glp-4(bn2)* larvae raised from L1 at 25°C (non-permissive temperature). The absence of germ-line was confirmed by gross morphology observation. Lane B shows RT-PCR products using primers B and R, which yield a 741 bp fragment diagnostic for F54E7.3c, the short transcript; Lane C shows RT-PCR products using primers C and R, which yield a 819 bp fragment diagnostic for F54E7.3b the long transcript. Lanes ctrl1 and 2 are additional negative controls (see text). The upper band in Lane B (asterisk) is due to spurious amplification of a contaminating bacterial sequence.
