# Supplementary material
Source: PubMed Central journal article supplement (PMC2915941)
Supplement: NIHMS217828-supplement-03.pdf [file NIHMS217828-supplement-03.pdf]

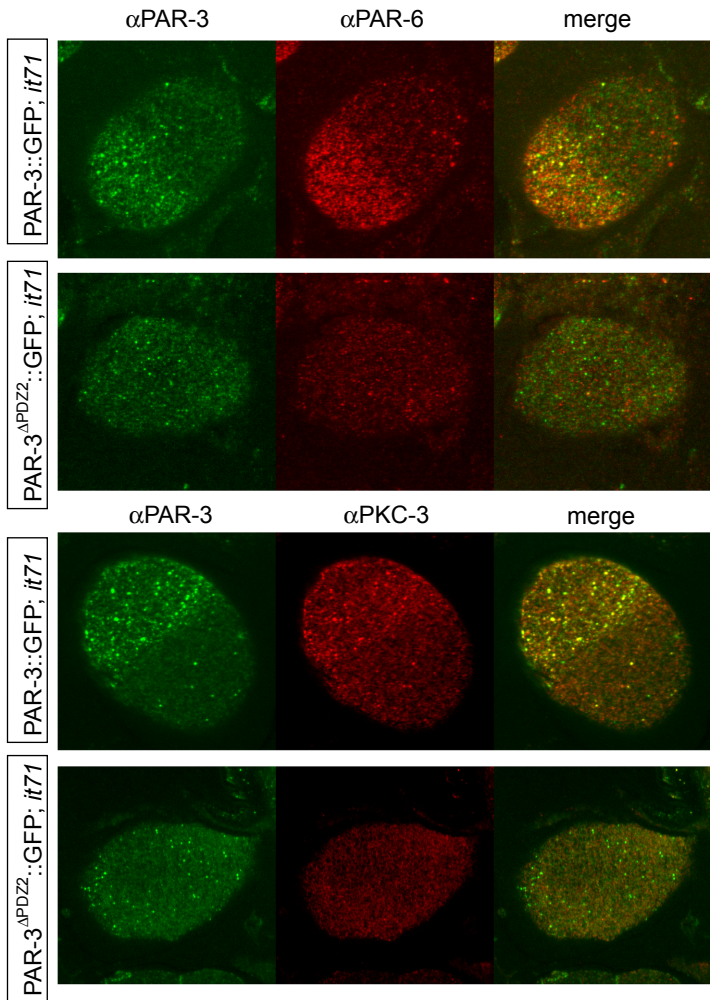

Figure S3. PAR-3 lacking PDZ2 fails to co-localize with PAR-6 and PKC-3. Confocal cortical sections of embryos of the indicated genotypes doubly labeled with anti-PAR-3 and anti-PAR-6 antibodies (top six panels) or with anti-PAR-3 and anti-PKC-3 (bottom six panels).
