# Supplementary material
Source: PubMed Central journal article supplement (PMC2915941)
Supplement: NIHMS217828-supplement-04.pdf [file NIHMS217828-supplement-04.pdf]

**A**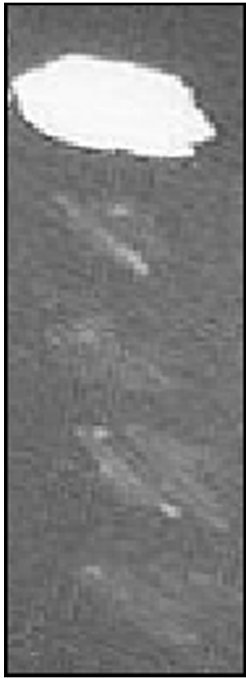

BD:CR1

AD:CR1

BD:empty

AD:CR1Δ(69-82)

BD:CR1

AD:CR1Δ(69-82)

BD:CR1Δ(69-82) AD:empty

BD:CR1Δ(69-82) AD:CR1

**B**

worm-only

conserved

interacts with CR1

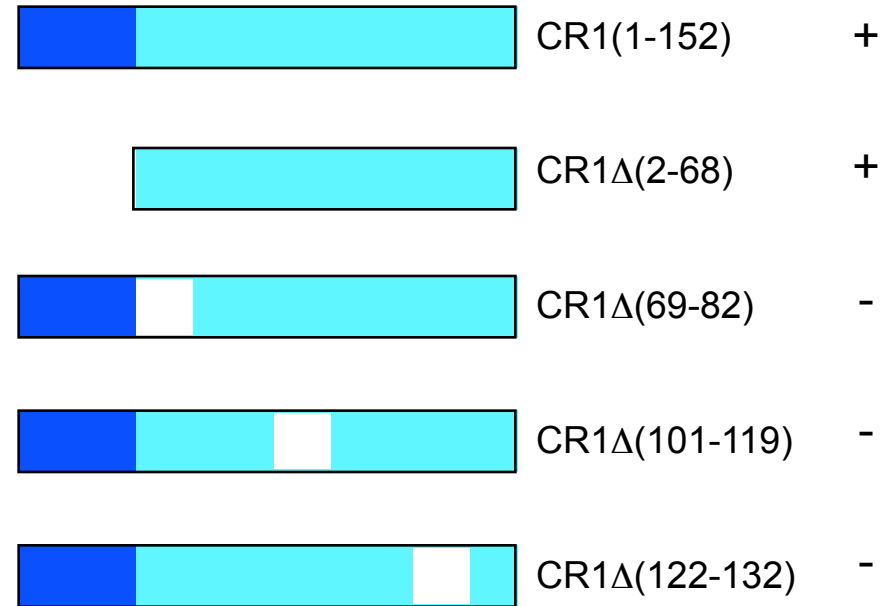

Supplemental Figure S4. Deletions within CR1 block PAR-3 self-association in yeast two-hybrid assays. A. Portion of a yeast growth plate showing growth when both Gal4 binding domain and activation domain fused to PAR-3 CR1 domain are co-expressed, but little or no growth when amino acids 69-82 are deleted from either of the fusion proteins. B. Summary of yeast two-hybrid results with other deletions of CR1.
