# Supplementary material
Source: PubMed Central journal article supplement (PMC2915941)

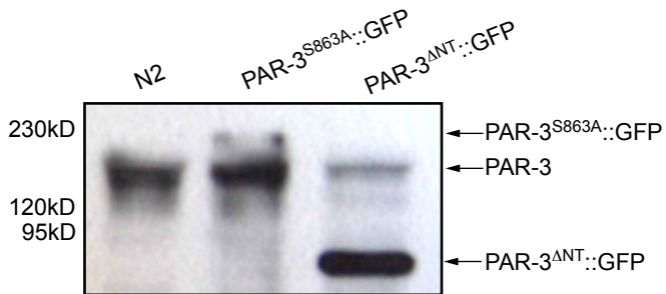

Fig. S2, Li et al.

Supplement: NIHMS217828-supplement-02.pdf [file NIHMS217828-supplement-02.pdf]
